# Supplementary material for: Development, scoring, and reliability of the Microscale Audit of Pedestrian Streetscapes (MAPS)
Source: PubMed Central journal article supplement (PMC3728214; doi:10.1186/1471-2458-13-403), 2013-04-27
Supplement: 1471-2458-13-403-S1.pdf [file 1471-2458-13-403-S1.pdf]

## MAPS Tool Development

### Land Use/Destinations (Route section)

| MAPS items | Source                        | Modification for MAPS?                                                                        |
|------------|-------------------------------|-----------------------------------------------------------------------------------------------|
| 1-4        | PRC-HAN [1, 2]                | No                                                                                            |
| 5          | Created by investigative team | N/A                                                                                           |
| 6a-ad      | PRC-HAN                       | Yes, response format and types of land uses: added 'Specialty Food Store', 'School', 'Casino' |
| 7          | Created by investigative team | N/A                                                                                           |

### Streetscape (Route section)

| MAPS items | Source                        | Modification for MAPS?                                                     |
|------------|-------------------------------|----------------------------------------------------------------------------|
| 1          | PRC-HAN                       | Yes, removed non-relevant response options; count for each                 |
| 2          | PRC-HAN                       | Yes, changed 'none' to 'neither'                                           |
| 2          | Created by investigative team | N/A                                                                        |
| 3          | PRC-HAN                       | Yes, changed to select the highest speed limit to get route level estimate |
| 4          | PRC-HAN                       | Yes, removed 'cul-de-sac' as an option; count for each                     |
| 5-6        | PRC-HAN                       | No                                                                         |
| 7          | PRC-HAN                       | Yes, added 'kiosks or information booths'                                  |
| 8          | Created by investigative team | N/A                                                                        |

### **Aesthetics and Social (Route section)**

| <b>MAPS items</b> | <b>Source</b>                 | <b>Modification for MAPS?</b>                                                          |
|-------------------|-------------------------------|----------------------------------------------------------------------------------------|
| 1-2               | PRC-HAN                       | Yes, split item to assess separately hardscape and softscape features                  |
| 3                 | PRC-HAN                       | Yes, removed 'artistic' because asked about in above items                             |
| 4-5               | PRC-HAN                       | Yes, modified wording of question and response format accordingly                      |
| 6a-h              | PRC-HAN                       | No                                                                                     |
| 6i-j              | Created by investigative team | N/A                                                                                    |
| 7-8               | PRC-HAN                       | No                                                                                     |
| 9                 | PRC-HAN                       | Yes, removed response options that were likely dependent upon time of day              |
| 10                | PRC-HAN                       | Yes, simplification of this item to make it less complicated to rate and less temporal |

## Segments

| MAPS items            | Source                                                                  | Modification for MAPS?                          |
|-----------------------|-------------------------------------------------------------------------|-------------------------------------------------|
| 1                     | PRC-HAN                                                                 | Yes, only one side                              |
| 2                     | PRC-HAN                                                                 | Yes, only one side; take out 'both' option      |
| 3a                    | PRC-HAN                                                                 | Yes, only one side                              |
| 3b                    | Created by investigative team                                           | N/A                                             |
| 4-9                   | PRC-HAN                                                                 | Yes, only one side                              |
| 10                    | Created by investigative team                                           | N/A                                             |
| 11 (one-way/two-way)  | Irvine-Minnesota [3]                                                    |                                                 |
| 12                    | PRC-HAN                                                                 | Yes, only one side; took out "in street option" |
| 13-14                 | PRC-HAN                                                                 | Yes, only one side                              |
| 15 (bicycle signs)    | PIN3 Neighborhood Audit Instrument [4]                                  |                                                 |
| 16 (skateboard signs) | Created by investigative team                                           |                                                 |
| 17                    | Irvine-Minnesota                                                        |                                                 |
| 18                    | Irvine-Minnesota                                                        |                                                 |
| 19                    | Observational Validation of Urban Design Measures for New York City [5] |                                                 |
| 20-21                 | Observational Validation of Urban Design Measures for New York City     |                                                 |
| 22 (material)         | Observational Validation of Urban Design Measures for New York City     |                                                 |
| 23-28                 | Created by investigative team                                           | N/A                                             |

## Crossings

| MAPS items | Source                        | Modification for MAPS?                                                                                                                        |
|------------|-------------------------------|-----------------------------------------------------------------------------------------------------------------------------------------------|
| 1          | PRC-HAN                       | No                                                                                                                                            |
| 2          | PRC-HAN                       | No                                                                                                                                            |
| 3          | PRC-HAN                       | No                                                                                                                                            |
| 4          | PRC-HAN                       | Yes, take out estimate of adequacy of timing to cross                                                                                         |
| 5          | PRC-HAN                       | Yes, changed response options to be consistent with crossing level and non temporal                                                           |
| 6          | Created by investigative team | N/A                                                                                                                                           |
| 7a-c       | PRC-HAN                       | Yes, removed 'map or info kiosk' and 'large print street signs'                                                                               |
| 8a-e       | PRC-HAN                       | Yes, combined 'stop lines' and 'additional warning' option; added 'different material than road' option                                       |
| 9          | Created by investigative team | N/A                                                                                                                                           |
| 10         | PRC-HAN                       | No                                                                                                                                            |
| 11         | PRC-HAN                       | Yes, changed 'refuge islands' to 'protected refuge islands'; removed 'center median strip', 'especially wide lanes' and 'angled intersection' |
| 12         | PRC-HAN                       | Removed 'missing or faded street signs'                                                                                                       |

### References

1. Kealey M, Kruger J, Hunter R, Ivey S, Satariano W, Bayles C, Ramirez B, Bryant L, Johnson C, Lee C, Levinger D, Mctigue K, Moni C, Moudon AV, Pluto D, Prohaska T, Sible C, Tindal S, Wilcox S, Winters K, Williams K: **Engaging Older Adults to Be More Active Where They Live: Audit Tool Development.** In *Proceedings of the 19th National Conference on Chronic Disease Prevention and Control: March 2005; Atlanta.*

2. Caughy MO, O'Campo PJ, Patterson J: **A brief observational measure for urban neighborhoods.** *Health Place* 2001, **7**:225-36. Retrieved from <http://www.ncbi.nlm.nih.gov/pubmed/11439257>
3. Boarnet MG, Day K, Alfonzo M, Forsyth A, Oakes M: **The Irvine-Minnesota inventory to measure built environments: reliability tests.** *Am J Prev Med* 2006, **30**:153-159. doi:10.1016/j.amepre.2005.09.018
4. Evenson KR, Sotres-Alvarez D, Herring AH, Messer L, Laraia BA, Rodríguez DA: **Assessing urban and rural neighborhood characteristics using audit and GIS data: Derivation and reliability of constructs.** *Int J Behav Nutr Phys Act* 2009, **6**:44. doi:10.1186/1479-5868-6-44
5. Ewing R, Clemente O, Handy S, Brownson RC, Winston E: **Identifying and measuring urban design qualities related to walkability.** Prepared for the Active Living Research Program of the Robert Wood Johnson Foundation, July 2005.
